# Supplementary material
Source: MDPI journal article supplement (https://www.mdpi.com/2072-4292/14/18/4634)
Supplement: s1 [file s1 › remotesensing-1916253-supplementary.pdf]

# Estimation of Swell Height Using Spaceborne GNSS-R Data from Eight CYGNSS Satellites

Jinwei Bu <sup>1,2,3</sup>, Kegen Yu <sup>1,2,\*</sup>, Hyuk Park <sup>3</sup>, Weimin Huang <sup>4</sup>, Shuai Han <sup>1,2</sup>, Qingyun Yan <sup>5</sup>, Nijia Qian <sup>1,2</sup> and Yiruo Lin <sup>1,2</sup>

<sup>1</sup> MNR Key Laboratory of Land Environment and Disaster Monitoring, China University of Mining and Technology, Xuzhou 221116, China

<sup>2</sup> School of Environment Science and Spatial Informatics, China University of Mining and Technology, Xuzhou 221116, China

<sup>3</sup> Department of Physics, Universitat Politècnica de Catalunya, 08034 Barcelona, Spain

<sup>4</sup> Department of Electrical and Computer Engineering, Memorial University of Newfoundland, St. John's, NL A1B 3X5, Canada

<sup>5</sup> School of Remote Sensing and Geomatics Engineering, Nanjing University of Information Science and Technology, Nanjing 210044, China

\* Correspondence: kegen.yu@cumt.edu.cn

## Contents of this file

**Figure S1.** Scatter density plots of CY03 swell height estimates and ERA5 swell height data.

**Figure S2.** Scatter density plots of CY04 swell height estimates and ERA5 swell height data.

**Figure S3.** Scatter density plots of CY05 swell height estimates and ERA5 swell height data.

**Figure S4.** Scatter density plots of CY06 swell height estimates and ERA5 swell height data.

**Figure S5.** Scatter density plots of CY07 swell height estimates and ERA5 swell height data.

**Figure S6.** Scatter density plots of CY08 swell height estimates and ERA5 swell height data.

The scatter density plots of CY03-CY08 satellites swell height estimates and ERA5 swell height data are shown in **Figure S1-S6**. The color bars show data density in relation to the distribution peak (from cool to warm). The dotted line in red represents the 1:1 reference line, whereas the magenta solid line represents the linear fitting results of GNSS-R swell height estimations and ERA5 swell height data.

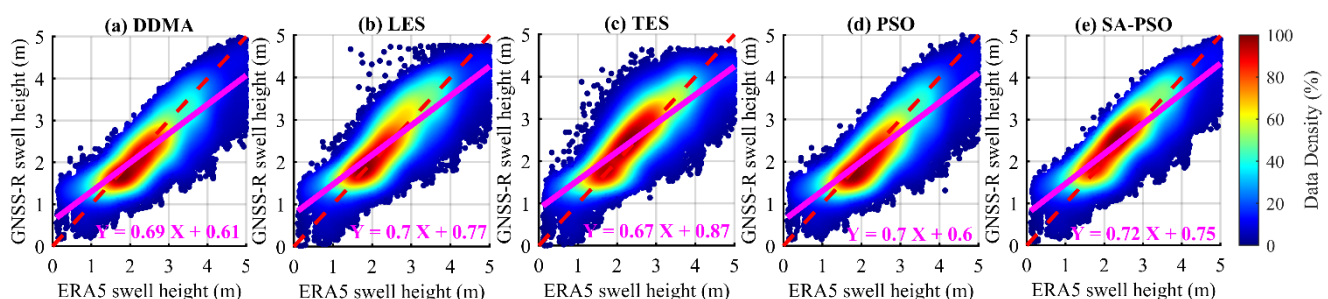

**Figure S1.** Scatter density plots of CY03 swell height estimates and ERA5 swell height data.

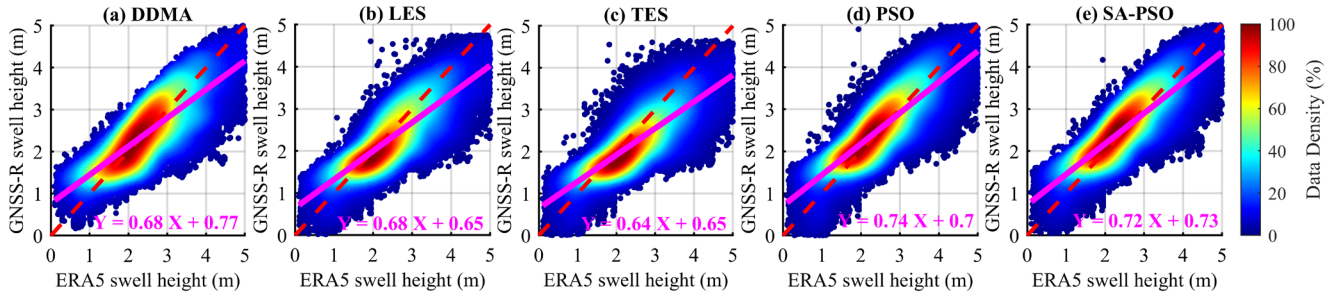

**Figure S2.** Scatter density plots of CY04 swell height estimates and ERA5 swell height data.

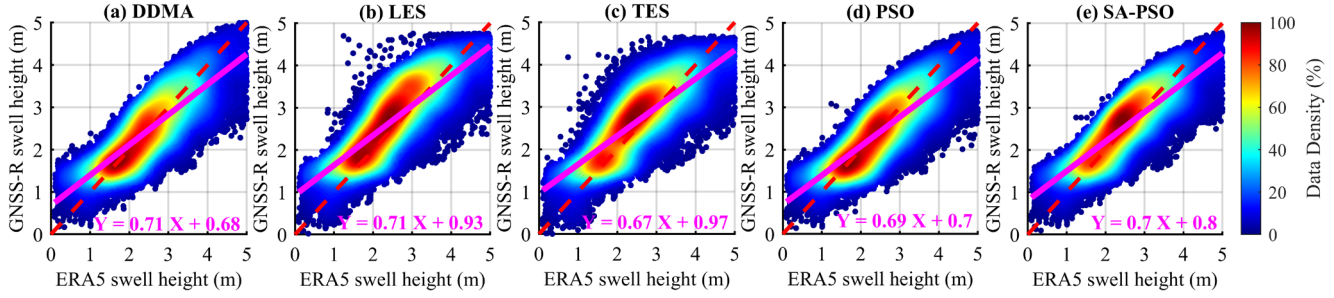

**Figure S3.** Scatter density plots of CY05 swell height estimates and ERA5 swell height data.

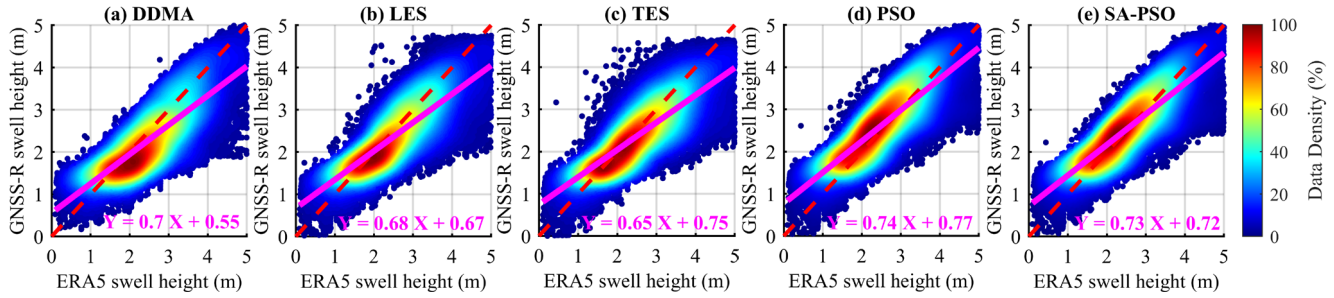

**Figure S4.** Scatter density plots of CY06 swell height estimates and ERA5 swell height data.

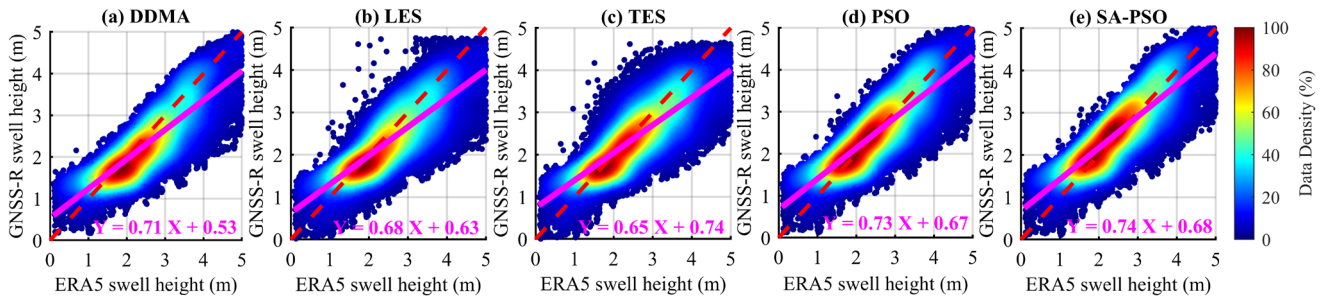

**Figure S5.** Scatter density plots of CY07 swell height estimates and ERA5 swell height data.

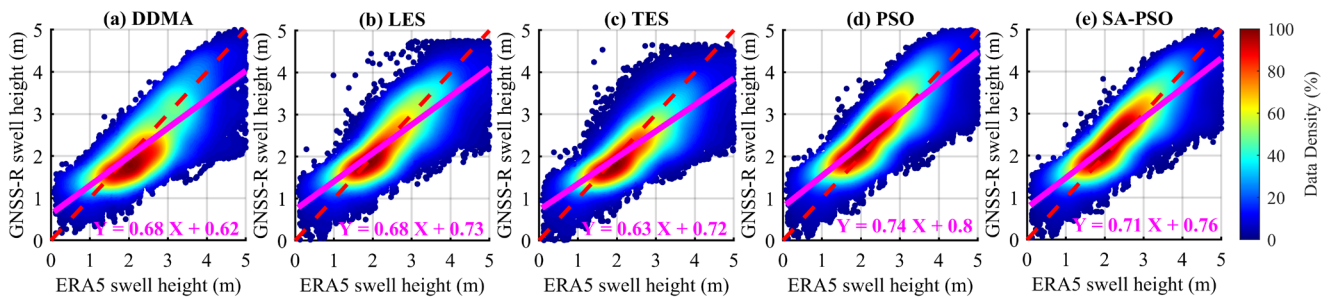

**Figure S6.** Scatter density plots of CY08 swell height estimates and ERA5 swell height data.
